# Supplementary material
Source: Springer Nature journal article supplement (https://www.springermedizin.de/resource/supplementary/12885_2009_1607_MOESM2_ESM.pdf/9472464)

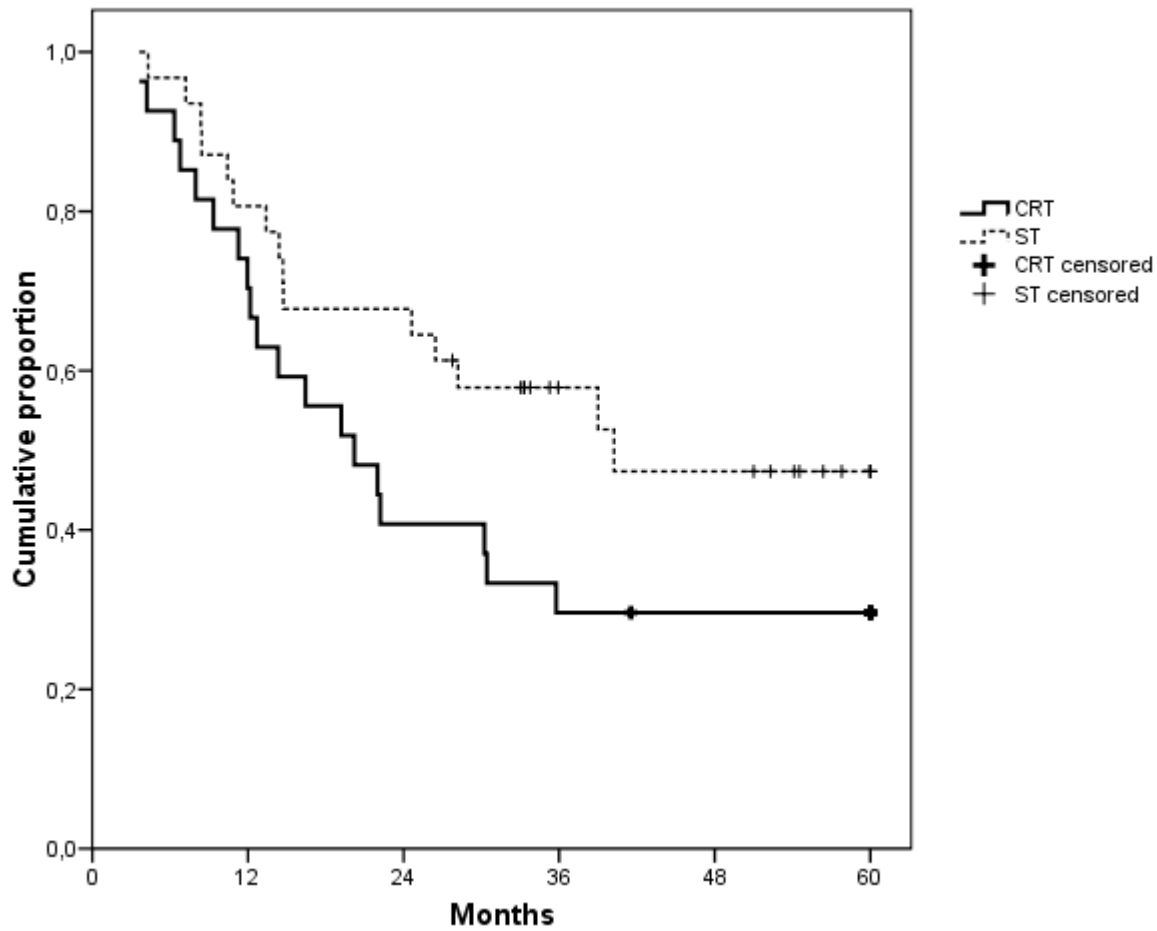

Supplement: MOESM2 [file 9472464]
